# Supplementary material
Source: PubMed Central journal article supplement (PMC4724939)
Supplement: NIHMS61513-supplement-1.pdf [file NIHMS61513-supplement-1.pdf]

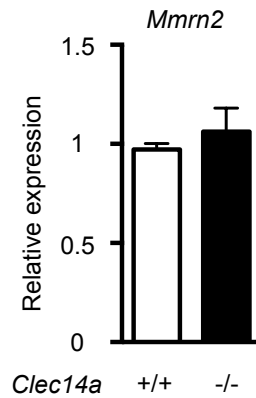

**Supplemental Figure 1 - *Mmrn2* expression in *Clec14a*<sup>-/-</sup> mice.**

Quantitative PCR analysis of cDNA generated from aortas taken from three *clec14a*<sup>+/+</sup> mice (white bars) and three *clec14a*<sup>-/-</sup> mice (black bars) for *Mmrn2*. Relative expression was determined by normalising expression to flotillin2.

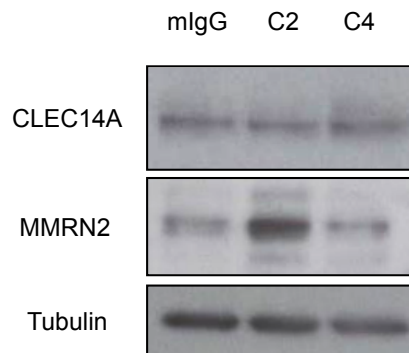

**Supplemental Figure 2 - CLEC14A antibody treatment has no effect on CLEC14A expression.**

HUVECs were treated with mIgG, C2 or C4 antibodies for 24 hours. Western blot analysis shows the relative levels of CLEC14A, MMRN2 and Tubulin.

|                               | Percentage of animals |
|-------------------------------|-----------------------|
| Male                          | 49.5                  |
| Female                        | 50.5                  |
| <i>Clec14a</i> <sup>-/-</sup> | 26.4                  |
| <i>Clec14a</i> <sup>-/+</sup> | 47.2                  |
| <i>Clec14a</i> <sup>+/+</sup> | 26.4                  |

**Supplemental Table 1 - Normal breeding for *Clec14a*<sup>-/+</sup> colony.**
